# Supplementary material for: ShenLing BaiZhu San alleviates Ulcerative Colitis in Rats by Regulating Gut Microbiota
Source: Research Square preprint supplement (doi:10.21203/rs.3.rs-90760/v1), 2020-10-16
Supplement: Supplementary file 1 [file a8c18c6873cf946432060296.pdf]

## Supplementary Materials

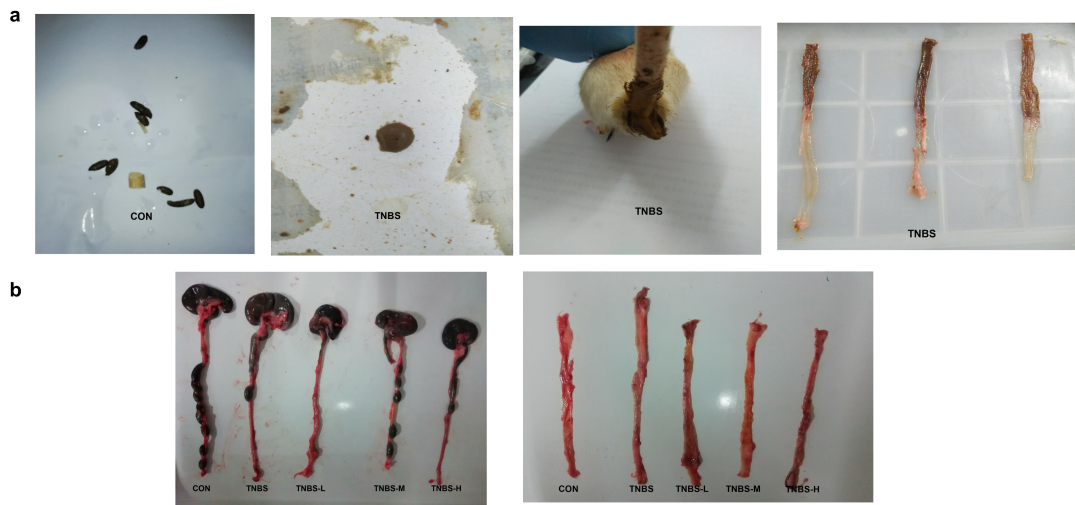

**Fig. S1** Changes of colonic tissues and defecation. **a** defecation and lesions of colon in TNBS-induced rats. **b** changes of colonic tissues in each group after SLBZS treatment.
